# Supplementary material for: M5C modulator mediated methylation pattern and TME cell infiltration in bladder cancer
Source: Research Square preprint supplement (doi:10.21203/rs.3.rs-1752939/v1), 2022-06-21
Supplement: Supplementary file 1 [file e3a1bbee314e12a653942011.docx]

**Fig.S1** Biological characteristics and external validation of m5Cscore. **A** Matrix-activation related genes were differential expressed between m5Cscore groups. **B** Immune-activation related genes were differential expressed between m5Cscore groups. **C** Expression of PD-1in two m5Cscore groups. **D-E** Survival analyses for low and high m5Cscore patient groups in the external groups (GSE48276, P=0.036; GSE31684, P=0.017). **F-G** Differences of local recurrence between two m5Cscore groups in GSE31684.
